# Supplementary material for: Identification and targeting of a unique NaV1.7 domain driving chronic pain
Source: PubMed Central journal article supplement — Proc Natl Acad Sci U S A. 2023 Jul 27;120(32):e2217800120. doi: 10.1073/pnas.2217800120 (PMC10410761; doi:10.1073/pnas.2217800120), 2023-07-27
Supplement: pnas.2217800120.sd01.pdf [file pnas.2217800120.sd01.pdf]

**Dataset 1**

| Figure panel | Assay                                                                                                   | Statistical Test; findings | Post-hoc analysis (adjusted p-values)                                                                                                                                                                                                                                                                                                                                                                                                                                        | Number of subjects                                                                                                                                                                                                                                                                                                                    | Number of subjects excluded (ROUT test)          |
|--------------|---------------------------------------------------------------------------------------------------------|----------------------------|------------------------------------------------------------------------------------------------------------------------------------------------------------------------------------------------------------------------------------------------------------------------------------------------------------------------------------------------------------------------------------------------------------------------------------------------------------------------------|---------------------------------------------------------------------------------------------------------------------------------------------------------------------------------------------------------------------------------------------------------------------------------------------------------------------------------------|--------------------------------------------------|
| Fig 1J       | Whole cell patch clamp electrophysiology – Peak sodium currents                                         | One Way ANOVA              | Holm-Sidak multiple comparison post-hoc test:<br><br>Halo-Nav <sub>v</sub> 1.7(WT) + TTX vs. Halo-Nav <sub>v</sub> 1.7(WT) + TTX + ProTx-II<br>p=0.0017<br><br>Halo-Nav <sub>v</sub> 1.7(WT) + TTX vs. Halo-Nav <sub>v</sub> 1.7(1.3) + TTX<br>p=0.0003<br><br>Halo-Nav <sub>v</sub> 1.7(WT) + TTX vs. Halo-Nav <sub>v</sub> 1.7(1.3) + TTX + ProTx-II<br>p=0.0006                                                                                                           | Halo-Nav <sub>v</sub> 1.7(WT) + TTX (n=16)<br><br>Halo-Nav <sub>v</sub> 1.7(WT) + TTX + ProTx-II (n=11)<br><br>Halo-Nav <sub>v</sub> 1.7(1.3) + TTX (n=15)<br><br>Halo-Nav <sub>v</sub> 1.7(1.3) + TTX + ProTx-II (n=11)                                                                                                              | Halo-Nav <sub>v</sub> 1.7(WT) + TTX excluded n=1 |
| Fig 1K       | Whole cell patch clamp electrophysiology – Peak TTX-R currents                                          | Kruskal-Wallis test        | Dunn's multiple comparison post-hoc test:<br><br>Halo-Nav <sub>v</sub> 1.7(WT) + TTX vs. Halo-Nav <sub>v</sub> 1.7(WT) + TTX + ProTx-II<br>p > 0.9999<br><br>Halo-Nav <sub>v</sub> 1.7(WT) + TTX vs. Halo-Nav <sub>v</sub> 1.7(1.3) + TTX<br>p > 0.9999<br><br>Halo-Nav <sub>v</sub> 1.7(WT) + TTX vs. Halo-Nav <sub>v</sub> 1.7(1.3) + TTX + ProTx-II<br>p > 0.9999                                                                                                         | Halo-Nav <sub>v</sub> 1.7(WT) + TTX (n=16)<br><br>Halo-Nav <sub>v</sub> 1.7(WT) + TTX + ProTx-II (n=11)<br><br>Halo-Nav <sub>v</sub> 1.7(1.3) + TTX (n=15)<br><br>Halo-Nav <sub>v</sub> 1.7(1.3) + TTX + ProTx-II (n=11)                                                                                                              | Halo-Nav <sub>v</sub> 1.7(WT) + TTX excluded n=1 |
| Table S1     | Biophysical properties of DRG neurons after transfection with Halo-Nav <sub>v</sub> 1.7(1.x) constructs | Mann-Whitney test          | Halo-Nav <sub>v</sub> 1.7(WT) vs Halo-Nav <sub>v</sub> 1.7(1.1)<br>Activation<br>V1/2, P<0.0001<br>K, P=0.6152<br>Inactivation<br>V1/2, P=0.0711<br>K, P=0.9536<br><br>Halo-Nav <sub>v</sub> 1.7(WT) vs Halo-Nav <sub>v</sub> 1.7(1.2)<br>Activation<br>V1/2, P=0.9998<br>K, P=0.0659<br>Inactivation<br>V1/2, P=0.5473<br>K, P=0.4067<br><br>Halo-Nav <sub>v</sub> 1.7(WT) vs Halo-Nav <sub>v</sub> 1.7(1.3)<br>Activation<br>V1/2, P=0.1431<br>K, P=0.7963<br>Inactivation | Halo-Nav <sub>v</sub> 1.7(WT) (n=15)<br>Halo-Nav <sub>v</sub> 1.7(1.1) (n=16)<br><br>Halo-Nav <sub>v</sub> 1.7(WT) (n=12)<br>Halo-Nav <sub>v</sub> 1.7(1.2) (n=13)<br><br>Halo-Nav <sub>v</sub> 1.7(WT) (n=15)<br>Halo-Nav <sub>v</sub> 1.7(1.3) (n=16)<br><br>Halo-Nav <sub>v</sub> 1.7(WT) (n=18)<br>Halo-Nav <sub>v</sub> 1.7(1.4) |                                                  |

|        |                                                           |                   |                                                                                                                                                                                                                                                                                                                                                                                                                                                                                                                                                                                                                                                                                                                                                                                               |                                                                                                                                                                                                                                                                                       |  |
|--------|-----------------------------------------------------------|-------------------|-----------------------------------------------------------------------------------------------------------------------------------------------------------------------------------------------------------------------------------------------------------------------------------------------------------------------------------------------------------------------------------------------------------------------------------------------------------------------------------------------------------------------------------------------------------------------------------------------------------------------------------------------------------------------------------------------------------------------------------------------------------------------------------------------|---------------------------------------------------------------------------------------------------------------------------------------------------------------------------------------------------------------------------------------------------------------------------------------|--|
|        |                                                           |                   | <p>V1/2, P=0.3836<br/>K, P=0.9571</p> <p>Halo-Nav1.7(WT) vs Halo-Nav1.7(1.4)<br/>Activation<br/>V1/2, P=0.1132<br/>K, P=0.1570<br/>Inactivation<br/>V1/2, P=0.2673<br/>K, P=0.6866</p> <p>Halo-Nav1.7(WT) vs Halo-Nav1.7(1.5)<br/>Activation<br/>V1/2, P&lt;0.0001<br/>K, P=0.5213<br/>Inactivation<br/>V1/2, P=0.7267<br/>K, P=0.3475</p> <p>Halo-Nav1.7(WT) vs Halo-Nav1.7(1.6)<br/>Activation<br/>V1/2, P=0.0962<br/>K, P=0.3842<br/>Inactivation<br/>V1/2, P=0.9133<br/>K, P=0.6158</p> <p>Halo-Nav1.7(WT) vs Halo-Nav1.7(1.8)<br/>Activation<br/>V1/2, P=0.2090<br/>K, P=0.7712<br/>Inactivation<br/>V1/2, P=0.9512<br/>K, P=0.7167</p> <p>Halo-Nav1.7(WT) vs Halo-Nav1.7(1.9)<br/>Activation<br/>V1/2, P=0.7178<br/>K, P=0.5300<br/>Inactivation<br/>V1/2, P=0.8809<br/>K, P=0.5232</p> | <p>(n=20)</p> <p>Halo-Nav1.7(WT)<br/>(n=15)<br/>Halo-Nav1.7(1.5)<br/>(n=14)</p> <p>Halo-Nav1.7(WT)<br/>(n=12)<br/>Halo-Nav1.7(1.6)<br/>(n=15)</p> <p>Halo-Nav1.7(WT)<br/>(n=15)<br/>Halo-Nav1.7(1.8)<br/>(n=17)</p> <p>Halo-Nav1.7(WT)<br/>(n=15)<br/>Halo-Nav1.7(1.9)<br/>(n=15)</p> |  |
| Fig 2C | CRMP2 immunoprecipitation followed by Nav1.7 western blot | Mann-Whitney test | <p>DMSO vs. Myr-TAT-SCR<br/>p&gt;0.9999</p> <p>DMSO vs. Myr-TAT-Nav1.7-CRS<br/>p=0.0267</p>                                                                                                                                                                                                                                                                                                                                                                                                                                                                                                                                                                                                                                                                                                   | <p>DMSO (n=5)</p> <p>Myr-TAT-SCR (n=5)</p> <p>Myr-TAT-Nav1.7-CRS (n=5)</p>                                                                                                                                                                                                            |  |
| Fig 2F | Whole cell patch clamp electrophysiology –                | Welch's t-test    | <p>Myr-TAT-Nav1.7-CRS vs.<br/>Myr-TAT-SCR<br/>p=0.0396</p>                                                                                                                                                                                                                                                                                                                                                                                                                                                                                                                                                                                                                                                                                                                                    | <p>Myr-TAT-Nav1.7-CRS (N=15)</p>                                                                                                                                                                                                                                                      |  |

|        |                                                                 |                     |                                                                                                                                                                                                                                                                                                                                                                               |                                                                                                                                                                      |  |
|--------|-----------------------------------------------------------------|---------------------|-------------------------------------------------------------------------------------------------------------------------------------------------------------------------------------------------------------------------------------------------------------------------------------------------------------------------------------------------------------------------------|----------------------------------------------------------------------------------------------------------------------------------------------------------------------|--|
|        | peak current density                                            |                     |                                                                                                                                                                                                                                                                                                                                                                               | Myr-TAT-SCR (N=13)                                                                                                                                                   |  |
| Fig 2G | Whole cell patch clamp electrophysiology – Peak TTX-R current   | Mann-Whitney test   | Myr-TAT-Nav1.7-CRS vs. Myr-TAT-SCR<br>p=0.8460                                                                                                                                                                                                                                                                                                                                | Myr-TAT-Nav1.7-CRS (N=16)<br><br>Myr-TAT-SCR (N=13)                                                                                                                  |  |
| Fig 2J | Whole cell patch clamp electrophysiology – peak current density | One-way ANOVA       | Tukey's multiple comparison post-hoc test:<br><br>Myr-TAT-SCR + Water vs. Myr-TAT-SCR + 5 nM ProTx-II<br>p=0.0130<br><br>Myr-TAT-SCR + Water vs. Myr-TAT-Nav1.7-CRS + Water<br>p=0.0470<br><br>Myr-TAT-SCR + Water vs. Myr-TAT-Nav1.7-CRS + 5 nM ProTx-II<br>p=0.0012<br><br>Myr-TAT-Nav1.7-CRS + Water vs. Myr-TAT-Nav1.7-CRS + 5 nM ProTx-II<br>p=0.8197                    | Myr-TAT-SCR + Water (N=14)<br><br>Myr-TAT-SCR + 5 nM ProTx-II (N=13)<br><br>Myr-TAT-Nav1.7-CRS + Water (N=12)<br><br>Myr-TAT-Nav1.7-CRS + 5 nM ProTx-II (N=8)        |  |
| Fig 2M | Whole cell patch clamp electrophysiology – peak current density | One-way ANOVA       | Tukey's multiple comparison post-hoc test:<br><br>Myr-TAT-SCR + Ctrl siRNA vs. Myr-TAT-SCR + CRMP2 siRNA<br>p=0.0416<br><br>Myr-TAT-SCR + Ctrl siRNA vs. Myr-TAT-Nav1.7-CRS + Ctrl siRNA<br>p=0.0573<br><br>Myr-TAT-SCR + Ctrl siRNA vs. Myr-TAT-Nav1.7-CRS + CRMP2 siRNA<br>p=0.0499<br><br>Myr-TAT-Nav1.7-CRS + Ctrl siRNA vs. Myr-TAT-Nav1.7-CRS + CRMP2 siRNA<br>p>0.9999 | Myr-TAT-SCR + Ctrl siRNA (n=13)<br><br>Myr-TAT-SCR + CRMP2 siRNA (n=12)<br><br>Myr-TAT-Nav1.7-CRS + Ctrl siRNA (n=12)<br><br>Myr-TAT-Nav1.7-CRS + CRMP2 siRNA (n=13) |  |
| Fig 2O | Total protein western blot                                      | Kruskal-Wallis test | DMSO vs. Myr-TAT-SCR<br>p=0.4620<br><br>DMSO vs. Myr-TAT-Nav1.7-CRS<br>p>0.9999                                                                                                                                                                                                                                                                                               | DMSO (n=4)<br><br>Myr-TAT-SCR (n=4)<br><br>Myr-TAT-Nav1.7-CRS (n=4)                                                                                                  |  |
| Fig 2Q | Cell surface biotinylation                                      | One-way ANOVA       | Kruskal-Wallis test:<br><br>DMSO vs. Myr-TAT-SCR                                                                                                                                                                                                                                                                                                                              | DMSO (n=5)                                                                                                                                                           |  |

|          |                                                                                |                           |                                                                                                                                                                                                                                                                                                                                                                                                                                                                               |                                                                                                                                                                                                              |  |
|----------|--------------------------------------------------------------------------------|---------------------------|-------------------------------------------------------------------------------------------------------------------------------------------------------------------------------------------------------------------------------------------------------------------------------------------------------------------------------------------------------------------------------------------------------------------------------------------------------------------------------|--------------------------------------------------------------------------------------------------------------------------------------------------------------------------------------------------------------|--|
|          |                                                                                |                           | <p>p=0.8734</p> <p>DMSO vs. Myr-TAT-Nav1.7-CRS<br/>p=0.0178</p>                                                                                                                                                                                                                                                                                                                                                                                                               | <p>Myr-TAT-SCR<br/>(n=5)</p> <p>Myr-TAT-Nav1.7-CRS<br/>(n=5)</p>                                                                                                                                             |  |
| Fig 2T   | Whole cell patch clamp electrophysiology – peak current density                | One-way ANOVA<br>p=0.0022 | <p>Kruskal-Wallis multiple comparison post-hoc test:</p> <p>Myr-TAT-SCR peptide + 0.1% DMSO vs. Myr-TAT-SCR peptide + 20 μM Pitstop2<br/>p&gt;0.9999</p> <p>Myr-TAT-SCR peptide + 0.1% DMSO vs. Myr-TAT-Nav1.7-CRS peptide + 0.1% DMSO<br/>p=0.0033</p> <p>Myr-TAT-SCR peptide + 20uM Pitstop2 vs. Myr-TAT-Nav1.7-CRS peptide + 20 μM Pitstop2<br/>p&gt;0.9999</p> <p>Myr-TAT-Nav1.7-CRS peptide + 0.1% DMSO vs. Myr-TAT-Nav1.7-CRS peptide + 20 μM Pitstop2<br/>p=0.0109</p> | <p>Myr-TAT-SCR peptide + 0.1% DMSO (n=15)</p> <p>Myr-TAT-SCR peptide + 20uM Pitstop2 (n=7)</p> <p>Myr-TAT-Nav1.7-CRS peptide + 0.1% DMSO (n=12)</p> <p>Myr-TAT-Nav1.7-CRS peptide + 20uM Pitstop2 (n=14)</p> |  |
| Table S2 | Biophysical properties of DRG neurons after treatment with interfering peptide | Mann-Whitney test         | <p><u>V1/2 Values:</u></p> <p>Activation<br/>Myr-TAT-SCR vs Myr-TAT-Nav1.7-CRS p=0.0299</p> <p>Inactivation<br/>Myr-TAT-SCR vs Myr-TAT-Nav1.7-CRS p=0.6919</p> <p><u>Slope values:</u></p> <p>Activation<br/>Myr-TAT-SCR vs Myr-TAT-Nav1.7-CRS p=0.0057</p> <p>Inactivation<br/>Myr-TAT-SCR vs Myr-TAT-Nav1.7-CRS p=0.1398</p>                                                                                                                                                | <p>Myr-TAT-SCR Activation V1/2 (n=10)<br/>K (n=10)</p> <p>Inactivation V1/2 (n=14)<br/>K (n=14)</p> <p>Myr-TAT-Nav1.7-CRS Activation V1/2 (n=9)<br/>K (n=9)</p> <p>Inactivation V1/2 (n=13)<br/>K (n=13)</p> |  |
|          | Biophysical properties of DRG neurons                                          | One-way ANOVA             | <p><u>V1/2 Values:</u></p> <p>Activation<br/>Myr-TAT-SCR + Vehicle vs Myr-TAT-SCR +</p>                                                                                                                                                                                                                                                                                                                                                                                       | <p>Myr-TAT-SCR + Vehicle Activation V1/2 (n=12)</p>                                                                                                                                                          |  |

|                                                                           |  |  |                                                                                                                                                                                                                                                                                                                                                                                                                                                                                                                                                                                                                                                                                                                                                                                                                                                                                                                                                                                                                                                                                                                                                                                                                                                                                                                                                                                                                                                                                               |                                                                                                                                                                                                                                                                                                                                                                                                                                                        |  |
|---------------------------------------------------------------------------|--|--|-----------------------------------------------------------------------------------------------------------------------------------------------------------------------------------------------------------------------------------------------------------------------------------------------------------------------------------------------------------------------------------------------------------------------------------------------------------------------------------------------------------------------------------------------------------------------------------------------------------------------------------------------------------------------------------------------------------------------------------------------------------------------------------------------------------------------------------------------------------------------------------------------------------------------------------------------------------------------------------------------------------------------------------------------------------------------------------------------------------------------------------------------------------------------------------------------------------------------------------------------------------------------------------------------------------------------------------------------------------------------------------------------------------------------------------------------------------------------------------------------|--------------------------------------------------------------------------------------------------------------------------------------------------------------------------------------------------------------------------------------------------------------------------------------------------------------------------------------------------------------------------------------------------------------------------------------------------------|--|
| <p>after treatment with interfering peptide and treated with ProTx-II</p> |  |  | <p>5 nM ProTx-II p&lt;0.0001<br/> Myr-TAT-SCR + Vehicle vs Myr-TAT-NaV1.7-CRS + Vehicle p=0.0119<br/> Myr-TAT-SCR + Vehicle vs Myr-TAT-NaV1.7-CRS + 5 nM ProTx-II p=0.0001<br/> Myr-TAT-SCR + 5 nM ProTx-II vs Myr-TAT-NaV1.7-CRS + Vehicle p=0.0165<br/> Myr-TAT-SCR + 5 nM ProTx-II vs Myr-TAT-NaV1.7-CRS + 5 nM ProTx-II p=0.9383<br/> <br/> Myr-TAT-NaV1.7-CRS + Vehicle vs Myr-TAT-NaV1.7-CRS + 5 nM ProTx-II p=0.3200<br/> <br/> Inactivation<br/> Myr-TAT-SCR + Vehicle vs Myr-TAT-SCR + 5 nM ProTx-II p=0.9981<br/> Myr-TAT-SCR + Vehicle vs Myr-TAT-NaV1.7-CRS + Vehicle p=0.1077<br/> Myr-TAT-SCR + Vehicle vs Myr-TAT-NaV1.7-CRS + 5 nM ProTx-II p=0.0120<br/> Myr-TAT-SCR + 5 nM ProTx-II vs Myr-TAT-NaV1.7-CRS + Vehicle p=0.1501<br/> Myr-TAT-SCR + 5 nM ProTx-II vs Myr-TAT-NaV1.7-CRS + 5 nM ProTx-II p=0.0174<br/> Myr-TAT-NaV1.7-CRS + Vehicle vs Myr-TAT-NaV1.7-CRS + 5 nM ProTx-II p=0.6028<br/> <br/> Slope Values :<br/> Activation<br/> Myr-TAT-SCR + Vehicle vs Myr-TAT-SCR + 5 nM ProTx-II p=0.2535<br/> Myr-TAT-SCR + Vehicle vs Myr-TAT-NaV1.7-CRS + Vehicle p=0.9772<br/> Myr-TAT-SCR + Vehicle vs Myr-TAT-NaV1.7-CRS + 5 nM ProTx-II p=0.5347<br/> Myr-TAT-SCR + 5 nM ProTx-II vs Myr-TAT-NaV1.7-CRS + Vehicle p=0.1318<br/> Myr-TAT-SCR + 5 nM ProTx-II vs Myr-TAT-NaV1.7-CRS + 5 nM ProTx-II p=0.9913<br/> Myr-TAT-NaV1.7-CRS + Vehicle vs Myr-TAT-NaV1.7-CRS + 5 nM ProTx-II p=0.3469<br/> <br/> Inactivation<br/> Myr-TAT-SCR + Vehicle vs Myr-TAT-SCR +</p> | <p>K (n=12)<br/> Inactivation V1/2 (n=11)<br/> K (n=11)<br/> <br/> Myr-TAT-SCR + 5 nM ProTx-II<br/> Activation V1/2 (n=11)<br/> K (n=11)<br/> Inactivation V1/2 (n=11)<br/> K (n=11)<br/> <br/> Myr-TAT-NaV1.7-CRS + Vehicle<br/> Activation V1/2 (n=11)<br/> K (n=11)<br/> Inactivation V1/2 (n=10)<br/> K (n=10)<br/> <br/> Myr-TAT-NaV1.7-CRS + 5 nM ProTx-II<br/> Activation V1/2 (n=7)<br/> K (n=7)<br/> Inactivation V1/2 (n=6)<br/> K (n=6)</p> |  |
|---------------------------------------------------------------------------|--|--|-----------------------------------------------------------------------------------------------------------------------------------------------------------------------------------------------------------------------------------------------------------------------------------------------------------------------------------------------------------------------------------------------------------------------------------------------------------------------------------------------------------------------------------------------------------------------------------------------------------------------------------------------------------------------------------------------------------------------------------------------------------------------------------------------------------------------------------------------------------------------------------------------------------------------------------------------------------------------------------------------------------------------------------------------------------------------------------------------------------------------------------------------------------------------------------------------------------------------------------------------------------------------------------------------------------------------------------------------------------------------------------------------------------------------------------------------------------------------------------------------|--------------------------------------------------------------------------------------------------------------------------------------------------------------------------------------------------------------------------------------------------------------------------------------------------------------------------------------------------------------------------------------------------------------------------------------------------------|--|

|  |                                                                                                             |  |                                                                                                                                                                                                                                                                                                                                                                                                                                                                                                                                                                                                                                                                                                                                                                                                                                                                                                                                                                                                                                                |                                                                                                                                                                                                                                                                                                                                                                                                                                                                                                                                                   |  |
|--|-------------------------------------------------------------------------------------------------------------|--|------------------------------------------------------------------------------------------------------------------------------------------------------------------------------------------------------------------------------------------------------------------------------------------------------------------------------------------------------------------------------------------------------------------------------------------------------------------------------------------------------------------------------------------------------------------------------------------------------------------------------------------------------------------------------------------------------------------------------------------------------------------------------------------------------------------------------------------------------------------------------------------------------------------------------------------------------------------------------------------------------------------------------------------------|---------------------------------------------------------------------------------------------------------------------------------------------------------------------------------------------------------------------------------------------------------------------------------------------------------------------------------------------------------------------------------------------------------------------------------------------------------------------------------------------------------------------------------------------------|--|
|  |                                                                                                             |  | <p>5 nM ProTx-II p=0.5017<br/> Myr-TAT-SCR + Vehicle vs Myr-TAT-NaV1.7-CRS + Vehicle p=0.9991<br/> Myr-TAT-SCR + Vehicle vs Myr-TAT-NaV1.7-CRS + 5 nM ProTx-II p=0.9965<br/> Myr-TAT-SCR + 5 nM ProTx-II vs Myr-TAT-NaV1.7-CRS + Vehicle p=0.6064<br/> Myr-TAT-SCR + 5 nM ProTx-II vs Myr-TAT-NaV1.7-CRS + 5 nM ProTx-II p=0.7658<br/> Myr-TAT-NaV1.7-CRS + Vehicle vs Myr-TAT-NaV1.7-CRS + 5 nM ProTx-II p=0.9997</p>                                                                                                                                                                                                                                                                                                                                                                                                                                                                                                                                                                                                                         |                                                                                                                                                                                                                                                                                                                                                                                                                                                                                                                                                   |  |
|  | Biophysical properties of DRG neurons after treatment with interfering peptide and treated with CRMP2 siRNA |  | <p>V1/2<br/> Activation<br/> Myr-TAT-SCR + siRNA-Control vs Myr-TAT-SCR + siRNA-CRMP2 p=0.5071<br/> Myr-TAT-SCR + siRNA-Control vs Myr-TAT-NaV1.7-CRS + siRNA-Control p=0.0489<br/> Myr-TAT-SCR + siRNA-Control vs Myr-TAT-NaV1.7-CRS + siRNA-CRMP2 p=0.9975<br/> Myr-TAT-SCR + siRNA-CRMP2 vs Myr-TAT-NaV1.7-CRS + siRNA-Control p=0.5149<br/> Myr-TAT-SCR + siRNA-CRMP2 vs Myr-TAT-NaV1.7-CRS + siRNA-CRMP2 p=0.5793<br/> Myr-TAT-NaV1.7-CRS + siRNA-Control vs Myr-TAT-NaV1.7-CRS + siRNA-CRMP2 p=0.0533</p> <p>Inactivation<br/> Myr-TAT-SCR + siRNA-Control vs Myr-TAT-SCR + siRNA-CRMP2 p=0.1480<br/> Myr-TAT-SCR + siRNA-Control vs Myr-TAT-NaV1.7-CRS + siRNA-Control p=0.3691<br/> Myr-TAT-SCR + siRNA-Control vs Myr-TAT-NaV1.7-CRS + siRNA-CRMP2 p=0.3810<br/> Myr-TAT-SCR + siRNA-CRMP2 vs Myr-TAT-NaV1.7-CRS + siRNA-Control p=0.8987<br/> Myr-TAT-SCR + siRNA-CRMP2 vs Myr-TAT-NaV1.7-CRS + siRNA-CRMP2 p=0.8708<br/> Myr-TAT-NaV1.7-CRS + siRNA-Control vs Myr-TAT-NaV1.7-CRS + siRNA-CRMP2 p&gt;0.9999</p> <p>Slope Values</p> | <p>Myr-TAT-SCR + siRNA-Control<br/> Activation<br/> V1/2 (n=8)<br/> K (n=8)<br/> Inactivation<br/> V1/2 (n=10)<br/> K (n=10)</p> <p>Myr-TAT-SCR + siRNA-CRMP2<br/> Activation<br/> V1/2 (n=10)<br/> K (n=10)<br/> Inactivation<br/> V1/2 (n=7)<br/> K (n=7)</p> <p>Myr-TAT-NaV1.7-CRS + siRNA-Control<br/> Activation<br/> V1/2 (n=10)<br/> K (n=10)<br/> Inactivation<br/> V1/2 (n=10)<br/> K (n=10)</p> <p>Myr-TAT-NaV1.7-CRS + siRNA-CRMP2<br/> Activation<br/> V1/2 (n=10)<br/> K (n=10)<br/> Inactivation<br/> V1/2 (n=11)<br/> K (n=11)</p> |  |

|  |                                                                                                          |               |                                                                                                                                                                                                                                                                                                                                                                                                                                                                                                                                                                                                                                                                                                                                                                                                                                                                                                                                                                                                                                          |                                                                                                                                                                                                                     |  |
|--|----------------------------------------------------------------------------------------------------------|---------------|------------------------------------------------------------------------------------------------------------------------------------------------------------------------------------------------------------------------------------------------------------------------------------------------------------------------------------------------------------------------------------------------------------------------------------------------------------------------------------------------------------------------------------------------------------------------------------------------------------------------------------------------------------------------------------------------------------------------------------------------------------------------------------------------------------------------------------------------------------------------------------------------------------------------------------------------------------------------------------------------------------------------------------------|---------------------------------------------------------------------------------------------------------------------------------------------------------------------------------------------------------------------|--|
|  |                                                                                                          |               | <p>Activation</p> <p>Myr-TAT-SCR + siRNA-Control vs Myr-TAT-SCR + siRNA-CRMP2 p=0.9986</p> <p>Myr-TAT-SCR + siRNA-Control vs Myr-TAT-NaV1.7-CRS + siRNA-Control p=0.8907</p> <p>Myr-TAT-SCR + siRNA-Control vs Myr-TAT-NaV1.7-CRS + siRNA-CRMP2 p=0.9976</p> <p>Myr-TAT-SCR + siRNA-CRMP2 vs Myr-TAT-NaV1.7-CRS + siRNA-Control p=0.9345</p> <p>Myr-TAT-SCR + siRNA-CRMP2 vs Myr-TAT-NaV1.7-CRS + siRNA-CRMP2 p&gt;0.9999</p> <p>Myr-TAT-NaV1.7-CRS + siRNA-Control vs Myr-TAT-NaV1.7-CRS + siRNA-CRMP2 p=0.9438</p> <p>Inactivation</p> <p>Myr-TAT-SCR + siRNA-Control vs Myr-TAT-SCR + siRNA-CRMP2 p=0.9027</p> <p>Myr-TAT-SCR + siRNA-Control vs Myr-TAT-NaV1.7-CRS + siRNA-Control p=0.8246</p> <p>Myr-TAT-SCR + siRNA-Control vs Myr-TAT-NaV1.7-CRS + siRNA-CRMP2 p=0.9949</p> <p>Myr-TAT-SCR + siRNA-CRMP2 vs Myr-TAT-NaV1.7-CRS + siRNA-Control p=0.9997</p> <p>Myr-TAT-SCR + siRNA-CRMP2 vs Myr-TAT-NaV1.7-CRS + siRNA-CRMP2 p=0.7964</p> <p>Myr-TAT-NaV1.7-CRS + siRNA-Control vs Myr-TAT-NaV1.7-CRS + siRNA-CRMP2 p=0.6771</p> |                                                                                                                                                                                                                     |  |
|  | Biophysical properties of DRG neurons after treatment with interfering peptide and treated with Pitstop2 | One-way ANOVA | <p>V1/2</p> <p>Activation</p> <p>Myr-TAT-SCR + DMSO vs Myr-TAT-SCR + 20 <math>\mu</math>M Pitstop2 p=0.0328</p> <p>Myr-TAT-SCR + DMSO vs Myr-TAT-NaV1.7-CRS + DMSO p=0.8854</p> <p>Myr-TAT-SCR + DMSO vs Myr-TAT-NaV1.7-CRS + 20 <math>\mu</math>M Pitstop2 p&gt;0.9999</p> <p>Myr-TAT-SCR + 20 <math>\mu</math>M Pitstop2 vs Myr-TAT-NaV1.7-CRS + DMSO p=0.1618</p> <p>Myr-TAT-SCR + 20 <math>\mu</math>M Pitstop2 vs Myr-TAT-NaV1.7-CRS + 20 <math>\mu</math>M Pitstop2 p=0.0378</p>                                                                                                                                                                                                                                                                                                                                                                                                                                                                                                                                                   | <p>Myr-TAT-SCR + DMSO</p> <p>Activation V1/2 (n=14) K (n=14)</p> <p>Inactivation V1/2 (n=9) K (n=9)</p> <p>Myr-TAT-SCR + 20 <math>\mu</math>M Pitstop2</p> <p>Activation V1/2 (n=7) K (n=7)</p> <p>Inactivation</p> |  |

|  |  |  |                                                                                                                                                                                                                                                                                                                                                                                                                                                                                                                                                                                                                                                                                                                                                                                                                                                                                                                                                                                                                                                                                                                                                                                                                                                                                                                                                                                                                                                                                                                                                                               |                                                                                                                                                                                                                                                                                                            |  |
|--|--|--|-------------------------------------------------------------------------------------------------------------------------------------------------------------------------------------------------------------------------------------------------------------------------------------------------------------------------------------------------------------------------------------------------------------------------------------------------------------------------------------------------------------------------------------------------------------------------------------------------------------------------------------------------------------------------------------------------------------------------------------------------------------------------------------------------------------------------------------------------------------------------------------------------------------------------------------------------------------------------------------------------------------------------------------------------------------------------------------------------------------------------------------------------------------------------------------------------------------------------------------------------------------------------------------------------------------------------------------------------------------------------------------------------------------------------------------------------------------------------------------------------------------------------------------------------------------------------------|------------------------------------------------------------------------------------------------------------------------------------------------------------------------------------------------------------------------------------------------------------------------------------------------------------|--|
|  |  |  | <p>Myr-TAT-NaV1.7-CRS + DMSO vs Myr-TAT-NaV1.7-CRS + 20 <math>\mu</math>M Pitstop2 p=0.9006</p> <p>Inactivation<br/>Myr-TAT-SCR + DMSO vs Myr-TAT-SCR + 20 <math>\mu</math>M Pitstop2 p=0.0008<br/>Myr-TAT-SCR + DMSO vs Myr-TAT-NaV1.7-CRS + DMSO p=0.0006<br/>Myr-TAT-SCR + DMSO vs Myr-TAT-NaV1.7-CRS + 20 <math>\mu</math>M Pitstop2 p=0.0004<br/>Myr-TAT-SCR + 20 <math>\mu</math>M Pitstop2 vs Myr-TAT-NaV1.7-CRS + DMSO p&gt;0.9999<br/>Myr-TAT-SCR + 20 <math>\mu</math>M Pitstop2 vs Myr-TAT-NaV1.7-CRS + 20 <math>\mu</math>M Pitstop2 p=0.9982<br/>Myr-TAT-NaV1.7-CRS + DMSO vs Myr-TAT-NaV1.7-CRS + 20 <math>\mu</math>M Pitstop2 p=0.9992</p> <p>Slope Values<br/>Activation<br/>Myr-TAT-SCR + DMSO vs Myr-TAT-SCR + 20 <math>\mu</math>M Pitstop2 p=0.5518<br/>Myr-TAT-SCR + DMSO vs Myr-TAT-NaV1.7-CRS + DMSO p=0.0561<br/>Myr-TAT-SCR + DMSO vs Myr-TAT-NaV1.7-CRS + 20 <math>\mu</math>M Pitstop2 p=0.1489<br/>Myr-TAT-SCR + 20 <math>\mu</math>M Pitstop2 vs Myr-TAT-NaV1.7-CRS + DMSO p=0.7943<br/>Myr-TAT-SCR + 20 <math>\mu</math>M Pitstop2 vs Myr-TAT-NaV1.7-CRS + 20 <math>\mu</math>M Pitstop2 p=0.9646<br/>Myr-TAT-NaV1.7-CRS + DMSO vs Myr-TAT-NaV1.7-CRS + 20 <math>\mu</math>M Pitstop2 p=0.9475</p> <p>Inactivation<br/>Myr-TAT-SCR + DMSO vs Myr-TAT-SCR + 20 <math>\mu</math>M Pitstop2 p=0.0295<br/>Myr-TAT-SCR + DMSO vs Myr-TAT-NaV1.7-CRS + DMSO p=0.7778<br/>Myr-TAT-SCR + DMSO vs Myr-TAT-NaV1.7-CRS + 20 <math>\mu</math>M Pitstop2 p=0.3964<br/>Myr-TAT-SCR + 20 <math>\mu</math>M Pitstop2 vs Myr-TAT-NaV1.7-CRS + DMSO p=0.2181</p> | <p>V1/2 (n=7)<br/>K (n=7)</p> <p>Myr-TAT-NaV1.7-CRS + DMSO<br/>Activation<br/>V1/2 (n=11)<br/>K (n=11)<br/>Inactivation<br/>V1/2 (n=8)<br/>K (n=8)</p> <p>Myr-TAT-NaV1.7-CRS + 20 <math>\mu</math>M Pitstop2<br/>Activation<br/>V1/2 (n=13)<br/>K (n=13)<br/>Inactivation<br/>V1/2 (n=10)<br/>K (n=10)</p> |  |
|--|--|--|-------------------------------------------------------------------------------------------------------------------------------------------------------------------------------------------------------------------------------------------------------------------------------------------------------------------------------------------------------------------------------------------------------------------------------------------------------------------------------------------------------------------------------------------------------------------------------------------------------------------------------------------------------------------------------------------------------------------------------------------------------------------------------------------------------------------------------------------------------------------------------------------------------------------------------------------------------------------------------------------------------------------------------------------------------------------------------------------------------------------------------------------------------------------------------------------------------------------------------------------------------------------------------------------------------------------------------------------------------------------------------------------------------------------------------------------------------------------------------------------------------------------------------------------------------------------------------|------------------------------------------------------------------------------------------------------------------------------------------------------------------------------------------------------------------------------------------------------------------------------------------------------------|--|



|        |                                                                       |                             |                                                                                                                                                                                                                                                                                                 |                                                                     |  |
|--------|-----------------------------------------------------------------------|-----------------------------|-------------------------------------------------------------------------------------------------------------------------------------------------------------------------------------------------------------------------------------------------------------------------------------------------|---------------------------------------------------------------------|--|
|        |                                                                       |                             | Myr-TAT-SCR + 20 $\mu$ M Pitstop2 vs Myr-TAT-Nav1.7-CRS + 20 $\mu$ M Pitstop2 p=0.4333<br>Myr-TAT-Nav1.7-CRS + DMSO vs Myr-TAT-Nav1.7-CRS + 20 $\mu$ M Pitstop2 p=0.9398                                                                                                                        |                                                                     |  |
| Fig 3B | Whole cell patch clamp electrophysiology – evoked action potentials   | Multiple Mann-Whitney tests | Myr-TAT-SCR vs. Myr-TAT-Nav1.7-CRS<br><br>0 pA, p>0.9999<br>10 pA, p=0.1593<br>20 pA, p=0.1023<br>30 pA, p=0.0167<br>40 pA, p=0.0353<br>50 pA, p=0.0167<br>60 pA, p=0.0538<br>70 pA, p=0.0276<br>80 pA, p=0.0112<br>90 pA, p=0.0364<br>100 pA, p=0.0632<br>110 pA, p=0.0097<br>120 pA, p=0.0153 | Myr-TAT-SCR (n=26)<br><br>Myr-TAT-Nav1.7-CRS (n=26)                 |  |
| Fig 3C | Whole cell patch clamp electrophysiology – resting membrane potential | Mann-Whitney tests          | Myr-TAT-SCR vs. Myr-TAT-Nav1.7-CRS<br>p=0.7462                                                                                                                                                                                                                                                  | Myr-TAT-SCR (n=26)<br><br>Myr-TAT-Nav1.7-CRS (n=26)                 |  |
| Fig 3E | Whole cell patch clamp electrophysiology – rheobase                   | Mann-Whitney tests          | Myr-TAT-SCR vs. Myr-TAT-Nav1.7-CRS<br>p=0.0035                                                                                                                                                                                                                                                  | Myr-TAT-SCR (n=26)<br><br>Myr-TAT-Nav1.7-CRS (n=26)                 |  |
| Fig 3F | Whole cell patch clamp electrophysiology – Input resistance           | Mann-Whitney tests          | Myr-TAT-SCR vs. Myr-TAT-Nav1.7-CRS<br>p=0.7336                                                                                                                                                                                                                                                  | Myr-TAT-SCR (n=26)<br><br>Myr-TAT-Nav1.7-CRS (n=26)                 |  |
| Fig 3H | Spinal cord CGRP release assay                                        | Two-Way ANOVA               | Sidak's multiple comparisons test<br><br>Fraction 1<br>Control vs. Myr-TAT-SCR<br>p=0.8968<br>Control vs. Myr-TAT-Nav1.7-CRS<br>p=0.1324<br>Myr-TAT-SCR vs Myr-TAT-Nav1.7-CRS p=0.4010<br><br>Fraction 2<br>Control vs. Myr-TAT-SCR<br>p=0.2430                                                 | DMSO (n=4)<br><br>Myr-TAT-SCR (n=4)<br><br>Myr-TAT-Nav1.7-CRS (n=4) |  |

|        |                                            |                             |                                                                                                                                                                                                                                                                                                                                                                                                                                                                                                                                                                                                                                                                                                                                                      |                                                                        |  |
|--------|--------------------------------------------|-----------------------------|------------------------------------------------------------------------------------------------------------------------------------------------------------------------------------------------------------------------------------------------------------------------------------------------------------------------------------------------------------------------------------------------------------------------------------------------------------------------------------------------------------------------------------------------------------------------------------------------------------------------------------------------------------------------------------------------------------------------------------------------------|------------------------------------------------------------------------|--|
|        |                                            |                             | <p>Control vs. Myr-TAT-Nav1.7-CRS<br/>p=0.1495<br/>Myr-TAT-SCR vs. Myr-TAT-Nav1.7-CRS p=0.8924</p> <p>Fraction 3<br/>Control vs. Myr-TAT-SCR<br/>p=0.9219<br/>Control vs. Myr-TAT-Nav1.7-CRS<br/>p=0.0026<br/>Myr-TAT-SCR vs. Myr-TAT-Nav1.7-CRS p=0.0012</p> <p>Fraction 4<br/>Control vs. Myr-TAT-SCR<br/>p=0.2418<br/>Control vs. Myr-TAT-Nav1.7-CRS<br/>p&lt;0.0001<br/>Myr-TAT-SCR vs. Myr-TAT-Nav1.7-CRS p&lt;0.0001</p> <p>Fraction 5<br/>Control vs. Myr-TAT-SCR<br/>p=0.5405<br/>Control vs. Myr-TAT-Nav1.7-CRS<br/>p=0.0191<br/>Myr-TAT-SCR vs. Myr-TAT-Nav1.7-CRS p=0.4724</p> <p>Fraction 6<br/>Control vs. Myr-TAT-SCR<br/>p=0.9613<br/>Control vs. Myr-TAT-Nav1.7-CRS<br/>p=0.7229<br/>Myr-TAT-SCR vs. Myr-TAT-Nav1.7-CRS p=0.9202</p> |                                                                        |  |
| Fig 4A | CRMP2 binding to peptide 141               | Mann-Whitney test           | WT vs. CRMP2 <sup>K374A/K374A</sup><br>p<0.0001                                                                                                                                                                                                                                                                                                                                                                                                                                                                                                                                                                                                                                                                                                      | WT (n=4)<br><br>CRMP2 <sup>K374A/K374A</sup> (n=4)                     |  |
| Fig 4B | SNI female rats – paw withdrawal threshold | Multiple Mann-Whitney tests | <p>Myr-TAT-SCR female vs. Myr-TAT-Nav1.7-CRS female (Pre-SNI, p&gt;0.9999)</p> <p>Myr-TAT-SCR female vs. Myr-TAT-Nav1.7-CRS female (t=0, p=0.9675)</p> <p>Myr-TAT-SCR female vs. Myr-TAT-Nav1.7-CRS female (t=0.5, p&gt;0.9999)</p> <p>Myr-TAT-SCR female vs. Myr-TAT-Nav1.7-CRS female (t=1, p=0.8918)</p> <p>Myr-TAT-SCR female vs. Myr-TAT-Nav1.7-CRS female (t=2, p=0.0173)</p> <p>Myr-TAT-SCR female vs. Myr-TAT-Nav1.7-CRS female (t=3, p=0.0022)</p> <p>Myr-TAT-SCR female vs. Myr-TAT-Nav1.7-CRS female (t=4, p=0.0152)</p>                                                                                                                                                                                                                  | <p>Myr-TAT-SCR female (n=6)</p> <p>Myr-TAT-Nav1.7-CRS female (n=6)</p> |  |

|        |                                                      |                     |                                                                                                                                                                                                                                                                                                                                                                                                                                                                                                                                    |                                                                                                                                        |  |
|--------|------------------------------------------------------|---------------------|------------------------------------------------------------------------------------------------------------------------------------------------------------------------------------------------------------------------------------------------------------------------------------------------------------------------------------------------------------------------------------------------------------------------------------------------------------------------------------------------------------------------------------|----------------------------------------------------------------------------------------------------------------------------------------|--|
|        |                                                      |                     | Myr-TAT-SCR female vs. Myr-TAT-Nav1.7-CRS female (t=5, p=0.0649)                                                                                                                                                                                                                                                                                                                                                                                                                                                                   |                                                                                                                                        |  |
|        | SNI male rats – paw withdrawal threshold             |                     | Myr-TAT-SCR male vs. Myr-TAT-Nav1.7-CRS male (Pre-SNI, p>0.9999)<br>Myr-TAT-SCR male vs. Myr-TAT-Nav1.7-CRS male (t=0, p=0.3095)<br>Myr-TAT-SCR male vs. Myr-TAT-Nav1.7-CRS male (t=0.5, p=0.4643)<br>Myr-TAT-SCR male vs. Myr-TAT-Nav1.7-CRS male (t=1, p=0.0833)<br>Myr-TAT-SCR male vs. Myr-TAT-Nav1.7-CRS male (t=2, p=0.0119)<br>Myr-TAT-SCR male vs. Myr-TAT-Nav1.7-CRS male (t=3, p=0.0119)<br>Myr-TAT-SCR male vs. Myr-TAT-Nav1.7-CRS male (t=4, p=0.0119)<br>Myr-TAT-SCR male vs. Myr-TAT-Nav1.7-CRS male (t=5, p=0.0119) | Myr-TAT-SCR male (n=6)<br>Myr-TAT-Nav1.7-CRS male (n=6)                                                                                |  |
| Fig 4C | Paw withdrawal threshold rats – area under the curve | Mann-Whitney test   | Myr-TAT-SCR female vs. Myr-TAT-Nav1.7-CRS female<br>p=0.0087<br><br>Myr-TAT-SCR male vs. Myr-TAT-Nav1.7-CRS male<br>p=0.0152                                                                                                                                                                                                                                                                                                                                                                                                       | Myr-TAT-SCR female (n=6)<br><br>Myr-TAT-Nav1.7-CRS female (n=6)<br><br>Myr-TAT-SCR male (n=6)<br><br>Myr-TAT-Nav1.7-CRS male (n=6)     |  |
| Fig 4D | Mouse thermal nociception – hot plate                | Kruskal-Wallis test | Myr-TAT-SCR vs. Myr-TAT-Nav1.7-CRS (females) p=0.1177<br><br>Myr-TAT-SCR vs. Myr-TAT-Nav1.7-CRS (males) p=0.5540                                                                                                                                                                                                                                                                                                                                                                                                                   | Female Myr-TAT-SCR (n=10)<br><br>Female Myr-TAT-Nav1.7-CRS (n=10)<br><br>Male Myr-TAT-SCR (n=10)<br><br>Male Myr-TAT-Nav1.7-CRS (n=10) |  |
| Fig 4E | Mouse thermal nociception – tail flick               | Kruskal-Wallis test | Myr-TAT-SCR vs. Myr-TAT-Nav1.7-CRS (females) p>0.9999<br><br>Myr-TAT-SCR vs. Myr-TAT-Nav1.7-CRS (males) p>0.9999                                                                                                                                                                                                                                                                                                                                                                                                                   | Female Myr-TAT-SCR (n=10)<br><br>Female Myr-TAT-Nav1.7-CRS (n=10)<br><br>Male Myr-TAT-SCR (n=10)<br><br>Male Myr-TAT-Nav1.7-CRS (n=10) |  |

|        |                                                                  |                             |                                                                                                                                                                                                                                                                                                                                                                                                                                                                       |                                                                                                                                                   |  |
|--------|------------------------------------------------------------------|-----------------------------|-----------------------------------------------------------------------------------------------------------------------------------------------------------------------------------------------------------------------------------------------------------------------------------------------------------------------------------------------------------------------------------------------------------------------------------------------------------------------|---------------------------------------------------------------------------------------------------------------------------------------------------|--|
| Fig 4F | Motor coordination in rats - rotarod                             | Multiple Mann-Whitney tests | <p>Males</p> <p>Myr-TAT-SCR vs. Myr-TAT-Nav1.7-CRS (baseline) p=0.4009</p> <p>Myr-TAT-SCR vs. Myr-TAT-Nav1.7-CRS (60 min post injection) p=0.8298</p> <p>Myr-TAT-SCR vs. Myr-TAT-Nav1.7-CRS (120 min post injection) p=0.3176</p> <p>Myr-TAT-SCR vs. Myr-TAT-Nav1.7-CRS (180 min post injection) p=0.7103</p> <p>Myr-TAT-SCR vs. Myr-TAT-Nav1.7-CRS (240 min post injection) p=0.9015</p> <p>Myr-TAT-SCR vs. Myr-TAT-Nav1.7-CRS (300 min post injection) p=0.6859</p> | <p>Myr-TAT-SCR (n=7)</p> <p>Myr-TAT-Nav1.7-CRS (n=7)</p>                                                                                          |  |
| Fig 5C | Whole cell patch clamp electrophysiology – peak current density  | Welch's t-test              | Myr-TAT-SCR vs. Myr-TAT-Nav1.7-CRS p=0.0002                                                                                                                                                                                                                                                                                                                                                                                                                           | <p>Myr-TAT-SCR (n=12)</p> <p>Myr-TAT-Nav1.7-CRS (n=12)</p>                                                                                        |  |
| Fig 5D | Whole cell patch clamp electrophysiology – TTX-R current density | Mann-Whitney test           | Myr-TAT-SCR vs. Myr-TAT-Nav1.7-CRS p=0.6194                                                                                                                                                                                                                                                                                                                                                                                                                           | <p>Myr-TAT-SCR (n=12)</p> <p>Myr-TAT-Nav1.7-CRS (n=12)</p>                                                                                        |  |
| Fig 5G | Whole cell patch clamp electrophysiology – peak current density  | One-way ANOVA               | <p>pAAV-SCR +Vehicle vs. pAAV-SCR + ProTx p=0.0024</p> <p>pAAV-SCR +Vehicle vs. pAAV-Nav1.7-CRS + vehicle p=0.0213</p> <p>pAAV-SCR +Vehicle vs. pAAV-Nav1.7-CRS + ProTx p=0.0003</p> <p>pAAV-Nav1.7-CRS + Vehicle vs. pAAV-Nav1.7-CRS + ProTx p&gt;0.9999</p>                                                                                                                                                                                                         | <p>pAAV-SCR +Vehicle (n=15)</p> <p>pAAV-SCR + Protox (n=12)</p> <p>pAAV-Nav1.7-CRS + Vehicle (n=13)</p> <p>pAAV-Nav1.7-CRS + Protox (n=15)</p>    |  |
| Fig 5J | Whole cell patch clamp electrophysiology – peak current density  | One-way ANOVA               | <p>pAAV-SCR +Vehicle vs. pAAV-SCR + Pitstop2 p&gt;0.9999</p> <p>pAAV-SCR +Vehicle vs. pAAV-Nav1.7-CRS + Vehicle p&gt;0.0018</p> <p>pAAV-SCR +Vehicle vs. pAAV-Nav1.7-CRS + Pitstop2 p&gt;0.9999</p> <p>pAAV-Nav1.7-CRS + Vehicle v.s pAAV-Nav1.7-CRS + Pitstop2 p=0.0115</p>                                                                                                                                                                                          | <p>pAAV-SCR +Vehicle (n=12)</p> <p>pAAV-SCR + Pitstop2 (n=15)</p> <p>pAAV-Nav1.7-CRS + Vehicle (n=15)</p> <p>pAAV-Nav1.7-CRS + Pitstop2 (n=9)</p> |  |

|          |                                                                             |                   |                                                                                                                                                                                                                                                                                                                                                                                                                                                                                                                                                                  |                                                                                                                                                                                                                                                                                                                                                                                   |  |
|----------|-----------------------------------------------------------------------------|-------------------|------------------------------------------------------------------------------------------------------------------------------------------------------------------------------------------------------------------------------------------------------------------------------------------------------------------------------------------------------------------------------------------------------------------------------------------------------------------------------------------------------------------------------------------------------------------|-----------------------------------------------------------------------------------------------------------------------------------------------------------------------------------------------------------------------------------------------------------------------------------------------------------------------------------------------------------------------------------|--|
| Fig 5L   | Slice patch clamp electrophysiology – Frequency of sEPSC                    | Mann-Whitney test | pAAV-SCR vs. pAAV-Nav1.7-CRS<br>p=0.0305                                                                                                                                                                                                                                                                                                                                                                                                                                                                                                                         | pAAV-SCR (n=12)<br><br>pAAV-Nav1.7-CRS (n=11)                                                                                                                                                                                                                                                                                                                                     |  |
| Fig 5L   | Slice patch clamp electrophysiology – Amplitud of sEPSC                     | Mann-Whitney test | pAAV-SCR vs. pAAV-Nav1.7-CRS<br>p=0.0357                                                                                                                                                                                                                                                                                                                                                                                                                                                                                                                         | pAAV-SCR (n=11)<br><br>pAAV-Nav1.7-CRS (n=10)                                                                                                                                                                                                                                                                                                                                     |  |
| Table S3 | Biophysical properties of DRG neurons after treatment with AAV              | Mann-Whitney test | <p><i>AAV-SCR vs AAV-Nav1.7-CRS</i></p> <p>V1/2<br/>Activation<br/>P=0.6571<br/>Inactivation<br/>P=0.8627</p> <p><i>AAV-SCR vs AAV-Nav1.7-CRS</i></p> <p>Slope<br/>Activation<br/>P=0.5775<br/>Inactivation<br/>P=0.4563</p>                                                                                                                                                                                                                                                                                                                                     | <p><i>AAV-SCR</i><br/>Activation<br/>V1/2 (n=12)<br/>K (n=12)<br/>Inactivation<br/>V1/2 (n=12)<br/>K (n=12)</p> <p><i>AAV-Nav1.7-CRS</i><br/>Activation<br/>V1/2 (n=12)<br/>K (n=12)<br/>Inactivation<br/>V1/2 (n=12)<br/>K (n=12)</p>                                                                                                                                            |  |
|          | Biophysical properties of DRG neurons after treatment with AAV and ProTx-II | One-Way ANOVA     | <p>V1/2<br/>Activation<br/>AAV-SCR +<br/>Vehicle vs. AAV-SCR + 5 nM ProTx-II<br/>P&lt;0.0001</p> <p>AAV-SCR +<br/>Vehicle vs. AAV-Nav1.7-CRS +<br/>Vehicle<br/>P=0.3475</p> <p>AAV-SCR +<br/>Vehicle vs. AAV-Nav1.7-CRS +<br/>5 nM ProTx-II<br/>P=0.9865</p> <p>AAV-SCR +<br/>5 nM ProTx-II vs. AAV-Nav1.7-CRS +<br/>Vehicle<br/>P&lt;0.0001</p> <p>AAV-SCR +<br/>5 nM ProTx-II vs. AAV-Nav1.7-CRS +<br/>5 nM ProTx-II<br/>P&lt;0.0001</p> <p>AAV-Nav1.7-CRS + Vehicle vs. AAV-Nav1.7-CRS +<br/>5 nM ProTx-II<br/>P=0.2012</p> <p>Inactivation<br/>AAV-SCR +</p> | <p>AAV-SCR +<br/>Vehicle<br/>Activation<br/>V1/2 (n=15)<br/>K (n=15)<br/>Inactivation<br/>V1/2 (n=15)<br/>K (n=15)</p> <p>AAV-SCR +<br/>5 nM ProTx-II<br/>Activation<br/>V1/2 (n=12)<br/>K (n=12)<br/>Inactivation<br/>V1/2 (n=12)<br/>K (n=12)</p> <p>AAV-Nav1.7-CRS<br/>+ Vehicle<br/>Activation<br/>V1/2 (n=13)<br/>K (n=13)<br/>Inactivation<br/>V1/2 (n=13)<br/>K (n=13)</p> |  |

|  |  |  |                                                                                                                                                                                                                                                                                                                                                                                                                                                                                                                                                                                                                                                                                                                                                                                                                                                                                                                                                                                                                            |                                                                                                                                         |  |
|--|--|--|----------------------------------------------------------------------------------------------------------------------------------------------------------------------------------------------------------------------------------------------------------------------------------------------------------------------------------------------------------------------------------------------------------------------------------------------------------------------------------------------------------------------------------------------------------------------------------------------------------------------------------------------------------------------------------------------------------------------------------------------------------------------------------------------------------------------------------------------------------------------------------------------------------------------------------------------------------------------------------------------------------------------------|-----------------------------------------------------------------------------------------------------------------------------------------|--|
|  |  |  | <p>Vehicle vs. AAV-SCR + 5 nM ProTx-II<br/>P=0.0493</p> <p>AAV-SCR +<br/>Vehicle vs. AAV-Nav1.7-CRS +<br/>Vehicle<br/>P=0.1129</p> <p>AAV-SCR +<br/>Vehicle vs. AAV-Nav1.7-CRS +<br/>5 nM ProTx-II<br/>P=0.9991</p> <p>AAV-SCR +<br/>5 nM ProTx-II vs. AAV-Nav1.7-CRS +<br/>Vehicle<br/>P&lt;0.0001</p> <p>AAV-SCR +<br/>5 nM ProTx-II vs. AAV-Nav1.7-CRS +<br/>5 nM ProTx-II<br/>P=0.0363</p> <p>AAV-Nav1.7-CRS + Vehicle vs. AAV-<br/>Nav1.7-CRS +<br/>5 nM ProTx-II<br/>P=0.1468</p> <p>Slope Values<br/>Activation<br/>AAV-SCR +<br/>Vehicle vs. AAV-SCR + 5 nM ProTx-II<br/>P=0.6643</p> <p>AAV-SCR +<br/>Vehicle vs. AAV-Nav1.7-CRS +<br/>Vehicle<br/>P=0.9836</p> <p>AAV-SCR +<br/>Vehicle vs. AAV-Nav1.7-CRS +<br/>5 nM ProTx-II<br/>P=0.2070</p> <p>AAV-SCR +<br/>5 nM ProTx-II vs. AAV-Nav1.7-CRS +<br/>Vehicle<br/>P=0.4754</p> <p>AAV-SCR +<br/>5 nM ProTx-II vs. AAV-Nav1.7-CRS +<br/>5 nM ProTx-II<br/>P=0.8856</p> <p>AAV-Nav1.7-CRS + Vehicle vs. AAV-<br/>Nav1.7-CRS +<br/>5 nM ProTx-II<br/>P=0.1176</p> | <p>AAV-Nav1.7-CRS<br/>+<br/>5 nM ProTx-II<br/>Activation<br/>V1/2 (n=15)<br/>K (n=15)<br/>Inactivation<br/>V1/2 (n=15)<br/>K (n=15)</p> |  |
|--|--|--|----------------------------------------------------------------------------------------------------------------------------------------------------------------------------------------------------------------------------------------------------------------------------------------------------------------------------------------------------------------------------------------------------------------------------------------------------------------------------------------------------------------------------------------------------------------------------------------------------------------------------------------------------------------------------------------------------------------------------------------------------------------------------------------------------------------------------------------------------------------------------------------------------------------------------------------------------------------------------------------------------------------------------|-----------------------------------------------------------------------------------------------------------------------------------------|--|

|                                                                              |               |                                                                                                                                                                                                                                                                                                                                                                                                                                                                                 |                                                                                                                                                                                                                                                                                                                                                                                                                                                                                                                     |  |  |
|------------------------------------------------------------------------------|---------------|---------------------------------------------------------------------------------------------------------------------------------------------------------------------------------------------------------------------------------------------------------------------------------------------------------------------------------------------------------------------------------------------------------------------------------------------------------------------------------|---------------------------------------------------------------------------------------------------------------------------------------------------------------------------------------------------------------------------------------------------------------------------------------------------------------------------------------------------------------------------------------------------------------------------------------------------------------------------------------------------------------------|--|--|
|                                                                              |               |                                                                                                                                                                                                                                                                                                                                                                                                                                                                                 | <p>Inactivation<br/>AAV-SCR +<br/>Vehicle vs. AAV-SCR + 5 nM ProTx-II<br/>P=0.9961</p> <p>AAV-SCR +<br/>Vehicle vs. AAV-Nav1.7-CRS +<br/>Vehicle<br/>P=0.7893</p> <p>AAV-SCR +<br/>Vehicle vs. AAV-Nav1.7-CRS +<br/>5 nM ProTx-II<br/>P=0.9997</p> <p>AAV-SCR +<br/>5 nM ProTx-II vs. AAV-Nav1.7-CRS +<br/>Vehicle<br/>P=0.6553</p> <p>AAV-SCR +<br/>5 nM ProTx-II vs. AAV-Nav1.7-CRS +<br/>5 nM ProTx-II<br/>P=0.9971</p> <p>AAV-Nav1.7-CRS + Vehicle vs. AAV-<br/>Nav1.7-CRS +<br/>5 nM ProTx-II<br/>P=0.7396</p> |  |  |
| Biophysical properties of DRG neurons after treatment with AAV and Pitstop 2 | One-Way ANOVA | <p>V1/2<br/>Activation<br/>AAV-SCR + DMSO vs. AAV-SCR +<br/>20 μM Pitstop2<br/>P=0.9961</p> <p>AAV-SCR + DMSO vs. AAV-Nav1.7-<br/>CRS + DMSO<br/>p&gt;0.9999</p> <p>AAV-SCR + DMSO vs. AAV-Nav1.7-<br/>CRS +<br/>20 μM Pitstop2<br/>P=0.9973</p> <p>AAV-SCR +<br/>20 μM Pitstop2 vs. AAV-Nav1.7-CRS +<br/>DMSO<br/>P=0.9995</p> <p>AAV-SCR +<br/>20 μM Pitstop2 vs. AAV-Nav1.7-CRS +<br/>20 μM Pitstop2<br/>P=0.9913</p> <p>AAV-Nav1.7-CRS + DMSO vs. AAV-<br/>Nav1.7-CRS +</p> | <p>AAV-SCR +<br/>DMSO<br/>Activation<br/>V1/2 (n=12)<br/>K (n=12)<br/>Inactivation<br/>V1/2 (n=12)<br/>K (n=12)</p> <p>AAV-SCR +<br/>20 μM Pitstop2<br/>Activation<br/>V1/2 (n=15)<br/>K (n=15)<br/>Inactivation<br/>V1/2 (n=15)<br/>K (n=15)</p> <p>AAV-Nav1.7-CRS<br/>+ DMSO<br/>Activation<br/>V1/2 (n=15)<br/>K (n=15)</p>                                                                                                                                                                                      |  |  |

|  |  |  |                                                                                                                                                                                                                                                                                                                                                                                                                                                                                                                                                                                                                                                                                                                                                                                                                                                                                                                                                                                                                                                                                                                                                                                                                                                     |                                                                                                                                                                                                            |  |
|--|--|--|-----------------------------------------------------------------------------------------------------------------------------------------------------------------------------------------------------------------------------------------------------------------------------------------------------------------------------------------------------------------------------------------------------------------------------------------------------------------------------------------------------------------------------------------------------------------------------------------------------------------------------------------------------------------------------------------------------------------------------------------------------------------------------------------------------------------------------------------------------------------------------------------------------------------------------------------------------------------------------------------------------------------------------------------------------------------------------------------------------------------------------------------------------------------------------------------------------------------------------------------------------|------------------------------------------------------------------------------------------------------------------------------------------------------------------------------------------------------------|--|
|  |  |  | <p>20 <math>\mu</math>M Pitstop2<br/>P=0.9974</p> <p>Inactivation<br/>AAV-SCR + DMSO vs. AAV-SCR +<br/>20 <math>\mu</math>M Pitstop2<br/>P=0.8802</p> <p>AAV-SCR + DMSO vs. AAV-Nav1.7-<br/>CRS + DMSO<br/>P=0.0517</p> <p>AAV-SCR + DMSO vs. AAV-Nav1.7-<br/>CRS +<br/>20 <math>\mu</math>M Pitstop2<br/>P=0.9997</p> <p>AAV-SCR +<br/>20 <math>\mu</math>M Pitstop2 vs. AAV-Nav1.7-CRS +<br/>DMSO<br/>P=0.0042</p> <p>AAV-SCR +<br/>20 <math>\mu</math>M Pitstop2 vs. AAV-Nav1.7-CRS +<br/>20 <math>\mu</math>M Pitstop2<br/>P=0.9378</p> <p>AAV-Nav1.7-CRS + DMSO vs. AAV-<br/>Nav1.7-CRS +<br/>20 <math>\mu</math>M Pitstop2<br/>P=0.0675</p> <p>Slope Values<br/>Activation<br/>AAV-SCR + DMSO vs. AAV-SCR +<br/>20 <math>\mu</math>M Pitstop2<br/>P=0.9522</p> <p>AAV-SCR + DMSO vs. AAV-Nav1.7-<br/>CRS + DMSO<br/>P=0.9973</p> <p>AAV-SCR + DMSO vs. AAV-Nav1.7-<br/>CRS +<br/>20 <math>\mu</math>M Pitstop2<br/>P=0.7382</p> <p>AAV-SCR +<br/>20 <math>\mu</math>M Pitstop2 vs. AAV-Nav1.7-CRS +<br/>DMSO<br/>P=0.8693</p> <p>AAV-SCR +<br/>20 <math>\mu</math>M Pitstop2 vs. AAV-Nav1.7-CRS +<br/>20 <math>\mu</math>M Pitstop2<br/>P=0.9365</p> <p>AAV-Nav1.7-CRS + DMSO vs. AAV-<br/>Nav1.7-CRS +<br/>20 <math>\mu</math>M Pitstop2</p> | <p>Inactivation<br/>V1/2 (n=15)<br/>K (n=15)</p> <p>AAV-Nav1.7-CRS<br/>+<br/>20 <math>\mu</math>M Pitstop2</p> <p>Activation<br/>V1/2 (n=9)<br/>K (n=9)</p> <p>Inactivation<br/>V1/2 (n=9)<br/>K (n=9)</p> |  |
|--|--|--|-----------------------------------------------------------------------------------------------------------------------------------------------------------------------------------------------------------------------------------------------------------------------------------------------------------------------------------------------------------------------------------------------------------------------------------------------------------------------------------------------------------------------------------------------------------------------------------------------------------------------------------------------------------------------------------------------------------------------------------------------------------------------------------------------------------------------------------------------------------------------------------------------------------------------------------------------------------------------------------------------------------------------------------------------------------------------------------------------------------------------------------------------------------------------------------------------------------------------------------------------------|------------------------------------------------------------------------------------------------------------------------------------------------------------------------------------------------------------|--|



|        |                                                |               |                                                                                                                                                                                                                                                                                                                                                                                                                                                                                                                                                                                                                 |                               |                        |
|--------|------------------------------------------------|---------------|-----------------------------------------------------------------------------------------------------------------------------------------------------------------------------------------------------------------------------------------------------------------------------------------------------------------------------------------------------------------------------------------------------------------------------------------------------------------------------------------------------------------------------------------------------------------------------------------------------------------|-------------------------------|------------------------|
|        |                                                |               | <p>P=0.6006</p> <p>Inactivation<br/>AAV-SCR + DMSO vs. AAV-SCR +<br/>20 <math>\mu</math>M Pitstop2<br/>P=0.9716</p> <p>AAV-SCR + DMSO vs. AAV-Nav1.7-<br/>CRS + DMSO<br/>P=0.9428</p> <p>AAV-SCR + DMSO vs. AAV-Nav1.7-<br/>CRS +<br/>20 <math>\mu</math>M Pitstop2<br/>P=0.8158</p> <p>AAV-SCR +<br/>20 <math>\mu</math>M Pitstop2 vs. AAV-Nav1.7-CRS +<br/>DMSO<br/>P=0.9992</p> <p>AAV-SCR +<br/>20 <math>\mu</math>M Pitstop2 vs. AAV-Nav1.7-CRS +<br/>20 <math>\mu</math>M Pitstop2<br/>P=0.9547</p> <p>AAV-Nav1.7-CRS + DMSO vs. AAV-<br/>Nav1.7-CRS +<br/>20 <math>\mu</math>M Pitstop2<br/>P=0.9776</p> |                               |                        |
| Fig 6D | Males SNI reversal – paw withdrawal thresholds | Two-way anova | <p>AAV-CMV-eGFP-Nav1.7-CRS vs. AAV-CMV-eGFP-SCR (Pre-SNI, p&gt;0.9999)</p> <p>AAV-CMV-eGFP-Nav1.7-CRS vs. AAV-CMV-eGFP-SCR (t=0d, p&gt;0.9999)</p> <p>AAV-CMV-eGFP-Nav1.7-CRS vs. AAV-CMV-eGFP-SCR (t=4d, p=0.0173)</p> <p>AAV-CMV-eGFP-Nav1.7-CRS vs. AAV-CMV-eGFP-SCR (t=7d, p=0.0087)</p> <p>AAV-CMV-eGFP-Nav1.7-CRS vs. AAV-CMV-eGFP-SCR (t=11d, p=0.0152)</p> <p>AAV-CMV-eGFP-Nav1.7-CRS vs. AAV-CMV-eGFP-SCR (t=14d, p=0.0087)</p> <p>AAV-CMV-eGFP-Nav1.7-CRS vs. AAV-CMV-eGFP-SCR (t=20d, p=0.0238)</p> <p>AAV-CMV-eGFP-Nav1.7-CRS vs. AAV-CMV-eGFP-SCR (t=24d, p=0.0866)</p>                            | AAV-CMV-eGFP-Nav1.7-CRS (n=5) | AAV-CMV-eGFP-SCR (n=6) |

|        |                                                  |                             |                                                                                                                                                                                                                                                                                                                                                                                                                                                                                                   |                                                         |  |
|--------|--------------------------------------------------|-----------------------------|---------------------------------------------------------------------------------------------------------------------------------------------------------------------------------------------------------------------------------------------------------------------------------------------------------------------------------------------------------------------------------------------------------------------------------------------------------------------------------------------------|---------------------------------------------------------|--|
|        |                                                  |                             | AAV-CMV-eGFP-Nav1.7-CRS vs. AAV-CMV-eGFP-SCR (t=31d, p=0.1212)                                                                                                                                                                                                                                                                                                                                                                                                                                    |                                                         |  |
| Fig 6E | Males SNI reversal – area under the curve        | Mann-Whitney test           | AAV-CMV-eGFP-Nav1.7-CRS vs AAV-CMV-eGFP-SCR (p=0.0043)                                                                                                                                                                                                                                                                                                                                                                                                                                            | AAV-CMV-eGFP-Nav1.7-CRS (n=5)<br>AAV-CMV-eGFP-SCR (n=6) |  |
| Fig 6F | Males SNI-Reversal Locomotor activity            | Mann-Whitney test           | AAV9-CMV-eGFP-SCR vs. AAV9-CMV-eGFP-Nav1.7<br>p=0.9307                                                                                                                                                                                                                                                                                                                                                                                                                                            | AAV9-CMV-eGFP-SCR (n=6)<br>AAV9-CMV-eGFP-Nav1.7 (n=5)   |  |
| Fig 6G | Males SNI-Reversal Open field test               | Multiple Mann-Whitney tests | Time in Periphery<br>AAV9-CMV-eGFP-SCR vs. AAV9-CMV-eGFP-Nav1.7<br>p=0.2786<br><br>Time in Center<br>AAV9-CMV-eGFP-SCR vs. AAV9-CMV-eGFP-Nav1.7<br>p=0.2786                                                                                                                                                                                                                                                                                                                                       | AAV9-CMV-eGFP-SCR (n=6)<br>AAV9-CMV-eGFP-Nav1.7 (n=5)   |  |
| Fig 6H | Females SNI reversal – paw withdrawal thresholds | Two-way anova               | AAV-CMV-eGFP-Nav1.7-CRS vs. AAV-CMV-eGFP-SCR (Pre-SNI, p>0.9999)<br><br>AAV-CMV-eGFP-Nav1.7-CRS vs. AAV-CMV-eGFP-SCR (t=7d, p=0.3770)<br><br>AAV-CMV-eGFP-Nav1.7-CRS vs. AAV-CMV-eGFP-SCR (t=11d, p=0.0275)<br><br>AAV-CMV-eGFP-Nav1.7-CRS vs. AAV-CMV-eGFP-SCR (t=14d, p=0.021)<br><br>AAV-CMV-eGFP-Nav1.7-CRS vs. AAV-CMV-eGFP-SCR (t=18d, p<0.0001)<br><br>AAV-CMV-eGFP-Nav1.7-CRS vs. AAV-CMV-eGFP-SCR (t=27d, p<0.0001)<br><br>AAV-CMV-eGFP-Nav1.7-CRS vs. AAV-CMV-eGFP-SCR (t=38d, p=0.004) | AAV-CMV-eGFP-SCR (n=8)<br>AAV-CMV-eGFP-Nav1.7-CRS (n=9) |  |
| Fig 6I | Females SNI reversal – area                      | Mann-Whitney test           | AAV-CMV-eGFP-Nav1.7-CRS vs. AAV-CMV-eGFP-SCR (p<0.0001)                                                                                                                                                                                                                                                                                                                                                                                                                                           | AAV-CMV-eGFP-SCR (n=8)                                  |  |

|        |                                                  |                             |                                                                                                                                                                                                                                                                                                                                                                                                                                                                                                                                                                    |                                                             |  |
|--------|--------------------------------------------------|-----------------------------|--------------------------------------------------------------------------------------------------------------------------------------------------------------------------------------------------------------------------------------------------------------------------------------------------------------------------------------------------------------------------------------------------------------------------------------------------------------------------------------------------------------------------------------------------------------------|-------------------------------------------------------------|--|
|        | under the curve                                  |                             |                                                                                                                                                                                                                                                                                                                                                                                                                                                                                                                                                                    | AAV-CMV-eGFP-Nav1.7-CRS (n=9)                               |  |
| Fig 6J | Females SNI reversal - Locomotor activity        | Mann-Whitney test           | AAV9-CMV-eGFP-SCR vs. AAV9-CMV-eGFP-Nav1.7<br>p=0.1520                                                                                                                                                                                                                                                                                                                                                                                                                                                                                                             | AAV9-CMV-eGFP-SCR (n=7)<br><br>AAV9-CMV-eGFP-Nav1.7 (n=8)   |  |
| Fig 6K | Females SNI-reversal Open field test             | Multiple Mann-Whitney tests | Time in Periphery<br>AAV9-CMV-eGFP-SCR vs. AAV9-CMV-eGFP-Nav1.7<br>p=0.8665<br><br>Time in Center<br>AAV9-CMV-eGFP-SCR vs. AAV9-CMV-eGFP-Nav1.7<br>p=0.8665                                                                                                                                                                                                                                                                                                                                                                                                        |                                                             |  |
| Fig 6L | Males SNI prevention – paw withdrawal thresholds | Two-way anova               | AAV-CMV-eGFP-Nav1.7-CRS vs. AAV-CMV-eGFP-SCR (BL1, p>0.9999)<br><br>AAV-CMV-eGFP-Nav1.7-CRS vs. AAV-CMV-eGFP-SCR (BL2, p>0.9999)<br><br>AAV-CMV-eGFP-Nav1.7-CRS vs. AAV-CMV-eGFP-SCR (t=6d, p=0.0424)<br><br>AAV-CMV-eGFP-Nav1.7-CRS vs. AAV-CMV-eGFP-SCR (t=8d, p=0.0002)<br><br>AAV-CMV-eGFP-Nav1.7-CRS vs. AAV-CMV-eGFP-SCR (t=12d, p=0.0005)<br><br>AAV-CMV-eGFP-Nav1.7-CRS vs. AAV-CMV-eGFP-SCR (t=19d, p=0.0005)<br><br>AAV-CMV-eGFP-Nav1.7-CRS vs. AAV-CMV-eGFP-SCR (t=21d, p=0.0015)<br><br>AAV-CMV-eGFP-Nav1.7-CRS vs. AAV-CMV-eGFP-SCR (t=54d, p=0.0038) | AAV-CMV-eGFP-SCR (n=7)<br><br>AAV-CMV-eGFP-Nav1.7-CRS (n=9) |  |
| Fig 6M | Males SNI prevention – area under the curve      | Mann-Whitney test           | AAV-CMV-eGFP-Nav1.7-CRS vs. AAV-CMV-eGFP-SCR (p=0.0002)                                                                                                                                                                                                                                                                                                                                                                                                                                                                                                            | AAV-CMV-eGFP-SCR (n=7)<br><br>AAV-CMV-eGFP-Nav1.7-CRS (n=9) |  |

|        |                                                    |                             |                                                                                                                                                                                                                                                                                                                                                                                                                                                                                                                    |                                                             |  |
|--------|----------------------------------------------------|-----------------------------|--------------------------------------------------------------------------------------------------------------------------------------------------------------------------------------------------------------------------------------------------------------------------------------------------------------------------------------------------------------------------------------------------------------------------------------------------------------------------------------------------------------------|-------------------------------------------------------------|--|
| Fig 6N | Males SNI prevention - Locomotor activity          | Mann-Whitney test           | AAV9-CMV-eGFP-SCR vs. AAV9-CMV-eGFP-Nav1.7<br>p=0.7577                                                                                                                                                                                                                                                                                                                                                                                                                                                             | AAV-CMV-eGFP-SCR (n=7)<br><br>AAV-CMV-eGFP-Nav1.7-CRS (n=9) |  |
| Fig 6O | Males SNI-Prevention Open field test               | Multiple Mann-Whitney tests | Time in Periphery<br>AAV9-CMV-eGFP-SCR vs. AAV9-CMV-eGFP-Nav1.7<br>P=0.1141<br><br>Time in Center<br>AAV9-CMV-eGFP-SCR vs. AAV9-CMV-eGFP-Nav1.7<br>P=0.1141                                                                                                                                                                                                                                                                                                                                                        | AAV-CMV-eGFP-SCR (n=7)<br><br>AAV-CMV-eGFP-Nav1.7-CRS (n=9) |  |
| Fig 6P | Females SNI prevention – paw withdrawal thresholds | Two-way anova               | AAV-CMV-eGFP-Nav1.7-CRS vs. AAV-CMV-eGFP-SCR (BL1,<br>p>0.9999)<br><br>AAV-CMV-eGFP-Nav1.7-CRS vs. AAV-CMV-eGFP-SCR (BL2,<br>p=0.2058)<br><br>AAV-CMV-eGFP-Nav1.7-CRS vs. AAV-CMV-eGFP-SCR (t=8d,<br>p=0.0024)<br><br>AAV-CMV-eGFP-Nav1.7-CRS vs. AAV-CMV-eGFP-SCR (t=12d,<br>p=0.0005)<br><br>AAV-CMV-eGFP-Nav1.7-CRS vs. AAV-CMV-eGFP-SCR (t=16d,<br>p=0.0256)<br><br>AAV-CMV-eGFP-Nav1.7-CRS vs. AAV-CMV-eGFP-SCR (t=20d,<br>p=0.0069)<br><br>AAV-CMV-eGFP-Nav1.7-CRS vs. AAV-CMV-eGFP-SCR (t=54d,<br>p=0.0107) | AAV-CMV-eGFP-SCR (n=9)<br><br>AAV-CMV-eGFP-Nav1.7-CRS (n=8) |  |
| Fig 6Q | Females SNI prevention – area under the curve      | Mann-Whitney test           | AAV-CMV-eGFP-Nav1.7-CRS vs AAV-CMV-eGFP-SCR (p<0.0001)                                                                                                                                                                                                                                                                                                                                                                                                                                                             | AAV-CMV-eGFP-SCR (n=9)<br><br>AAV-CMV-eGFP-Nav1.7-CRS (n=8) |  |
| Fig 6R | Females SNI prevention - Locomotor activity        | Mann-Whitney test           | AAV9-CMV-eGFP-SCR vs. AAV9-CMV-eGFP-Nav1.7<br>p=0.3704                                                                                                                                                                                                                                                                                                                                                                                                                                                             | AAV-CMV-eGFP-SCR (n=9)<br><br>AAV-CMV-eGFP-Nav1.7-CRS (n=8) |  |
| Fig 6S | Females SNI-prevention                             | Multiple Mann-Whitney tests | Time in Periphery<br>AAV9-CMV-eGFP-SCR vs. AAV9-CMV-eGFP-Nav1.7<br>p=0.5414                                                                                                                                                                                                                                                                                                                                                                                                                                        | AAV-CMV-eGFP-SCR (n=9)                                      |  |

|        |                                                            |                 |                                                                                                                                                                                                                                                                                                                                                                                                                                                                                                                                                                                                                                                                                                                                                                                                                                                                                                                                                                                                                                                                                          |                                                                                                                                                          |  |
|--------|------------------------------------------------------------|-----------------|------------------------------------------------------------------------------------------------------------------------------------------------------------------------------------------------------------------------------------------------------------------------------------------------------------------------------------------------------------------------------------------------------------------------------------------------------------------------------------------------------------------------------------------------------------------------------------------------------------------------------------------------------------------------------------------------------------------------------------------------------------------------------------------------------------------------------------------------------------------------------------------------------------------------------------------------------------------------------------------------------------------------------------------------------------------------------------------|----------------------------------------------------------------------------------------------------------------------------------------------------------|--|
|        | Open field test                                            |                 | Time in Center<br>AAV9-CMV-eGFP-SCR vs. AAV9-CMV-eGFP-Nav1.7 p=0.5414                                                                                                                                                                                                                                                                                                                                                                                                                                                                                                                                                                                                                                                                                                                                                                                                                                                                                                                                                                                                                    | AAV-CMV-eGFP-Nav1.7-CRS (n=8)                                                                                                                            |  |
| Fig 7A | Paclitaxel paw withdrawal threshold                        | Three-way ANOVA | <p>Holm-Sidak post-hoc test:</p> <p>Time p&lt;0.0001<br/>Treatment Tx p&lt;0.0001<br/>Virus Tx p&lt;0.0001<br/>Time x Treatment Tx p&lt;0.0001<br/>Time x Virus Tx p=0.0002<br/>Treatment Tx x Virus Tx p=0.0077<br/>Time x Treatment Tx x Virus Tx p=0.0708</p> <p>7 days: Veh + AAV9-CMV-eGFP-SCR vs. 7 days: Pac + AAV9-CMV-eGFP-SCR p=0.0024<br/>14 days: Veh + AAV9-CMV-eGFP-SCR vs. 14 days: Pac + AAV9-CMV-eGFP-SCR p=0.0827<br/>16 days: Veh + AAV9-CMV-eGFP-SCR vs. 16 days: Pac + AAV9-CMV-eGFP-SCR p=0.0136<br/>21 days: Veh + AAV9-CMV-eGFP-SCR vs. 21 days: Pac + AAV9-CMV-eGFP-SCR p=0.0360<br/>7 days: Veh + AAV9-CMV-eGFP-Nav1.7-CRS vs. 7 days: Pac + AAV9-CMV-eGFP-Nav1.7-CRS p&lt;0.0001<br/>7 days: Pac + AAV9-CMV-eGFP-SCR vs. 7 days: Pac + AAV9-CMV-eGFP-Nav1.7-CRS p&gt;0.9999<br/>14 days: Pac + AAV9-CMV-eGFP-SCR vs. 14 days: Pac + AAV9-CMV-eGFP-Nav1.7-CRS p=0.2977<br/>16 days: Pac + AAV9-CMV-eGFP-SCR vs. 16 days: Pac + AAV9-CMV-eGFP-Nav1.7-CRS p=0.0096<br/>21 days: Pac + AAV9-CMV-eGFP-SCR vs. 21 days: Pac + AAV9-CMV-eGFP-Nav1.7-CRS p=0.0345</p> | <p>Veh + AAV9-CMV-eGFP-SCR (n=8)<br/>Veh + AAV9-CMV-eGFP-Nav1.7-CRS (n=8)<br/>Pac + AAV9-CMV-eGFP-SCR (n=8)<br/>Pac + AAV9-CMV-eGFP-Nav1.7-CRS (n=8)</p> |  |
| Fig 7B | Paclitaxel paw withdrawal threshold – area under the curve | One-way ANOVA   | <p>Veh + AAV9-CMV-eGFP-SCR vs. Veh + AAV9-CMV-eGFP-Nav1.7-CRS p=0.4799<br/>Veh + AAV9-CMV-eGFP-SCR vs. Pac + AAV9-CMV-eGFP-SCR p&lt;0.0001<br/>Veh + AAV9-CMV-eGFP-SCR vs. Pac + AAV9-CMV-eGFP-Nav1.7-CRS p=0.1597<br/>Veh + AAV9-CMV-eGFP-Nav1.7-CRS vs. Pac + AAV9-CMV-eGFP-SCR p&lt;0.0001</p>                                                                                                                                                                                                                                                                                                                                                                                                                                                                                                                                                                                                                                                                                                                                                                                        | <p>Veh + AAV9-CMV-eGFP-SCR (n=8)<br/>Veh + AAV9-CMV-eGFP-Nav1.7-CRS (n=8)<br/>Pac + AAV9-CMV-eGFP-SCR (n=8)<br/>Pac + AAV9-CMV-eGFP-Nav1.7-CRS</p>       |  |

|        |                                                          |                 |                                                                                                                                                                                                                                                                                                                                                                                                                                                                                                                                                                                                                                                                                                                                                                                                                                                                                                                                                                                                                                                                                                                                          |                                                                                                                                                                   |  |
|--------|----------------------------------------------------------|-----------------|------------------------------------------------------------------------------------------------------------------------------------------------------------------------------------------------------------------------------------------------------------------------------------------------------------------------------------------------------------------------------------------------------------------------------------------------------------------------------------------------------------------------------------------------------------------------------------------------------------------------------------------------------------------------------------------------------------------------------------------------------------------------------------------------------------------------------------------------------------------------------------------------------------------------------------------------------------------------------------------------------------------------------------------------------------------------------------------------------------------------------------------|-------------------------------------------------------------------------------------------------------------------------------------------------------------------|--|
|        |                                                          |                 | <p>Veh + AAV9-CMV-eGFP-Nav1.7-CRS vs. Pac + AAV9-CMV-eGFP-Nav1.7-CRS p=0.0062</p> <p>Pac + AAV9-CMV-eGFP-SCR vs. Pac + AAV9-CMV-eGFP-Nav1.7-CRS p&lt;0.0001</p>                                                                                                                                                                                                                                                                                                                                                                                                                                                                                                                                                                                                                                                                                                                                                                                                                                                                                                                                                                          | (n=8)                                                                                                                                                             |  |
| Fig 7C | Paclitaxel time aversive response                        | Three-way ANOVA | <p>Holm-Sidak post-hoc test:</p> <p>Time p&lt;0.0001</p> <p>Treatment Tx p&lt;0.0001</p> <p>Virus Tx p&lt;0.0001</p> <p>Time x Treatment Tx p&lt;0.0001</p> <p>Time x Virus Tx p&lt;0.0001</p> <p>Treatment Tx x Virus Tx p&lt;0.0001</p> <p>Time x Treatment Tx x Virus Tx p&lt;0.0001</p> <p>8 days: Veh + AAV9-CMV-eGFP-SCR vs. 8 days: Pac + AAV9-CMV-eGFP-SCR p=0.0024</p> <p>15 days: Veh + AAV9-CMV-eGFP-SCR vs. 15 days: Pac + AAV9-CMV-eGFP-SCR p=0.0024</p> <p>17 days: Veh + AAV9-CMV-eGFP-SCR vs. 17 days: Pac + AAV9-CMV-eGFP-SCR p=0.0190</p> <p>22 days: Veh + AAV9-CMV-eGFP-SCR vs. 22 days: Pac + AAV9-CMV-eGFP-SCR p=0.0027</p> <p>8 days: Veh + AAV9-CMV-eGFP-Nav1.7-CRS vs. 8 days: Pac + AAV9-CMV-eGFP-Nav1.7-CRS p=0.0033</p> <p>8 days: Pac + AAV9-CMV-eGFP-SCR vs. 8 days: Pac + AAV9-CMV-eGFP-Nav1.7-CRS p&gt;0.9999</p> <p>15 days: Pac + AAV9-CMV-eGFP-SCR vs. 15 days: Pac + AAV9-CMV-eGFP-Nav1.7-CRS p=0.0049</p> <p>17 days: Pac + AAV9-CMV-eGFP-SCR vs. 17 days: Pac + AAV9-CMV-eGFP-Nav1.7-CRS p=0.0227</p> <p>22 days: Pac + AAV9-CMV-eGFP-SCR vs. 22 days: Pac + AAV9-CMV-eGFP-Nav1.7-CRS p=0.0108</p> | <p>Veh + AAV9-CMV-eGFP-SCR (n=8)</p> <p>Veh + AAV9-CMV-eGFP-Nav1.7-CRS (n=8)</p> <p>Pac + AAV9-CMV-eGFP-SCR (n=8)</p> <p>Pac + AAV9-CMV-eGFP-Nav1.7-CRS (n=8)</p> |  |
| Fig 7D | Paclitaxel time aversive response – area under the curve | One-way ANOVA   | <p>Veh + AAV9-CMV-eGFP-SCR vs. Veh + AAV9-CMV-eGFP-Nav1.7-CRS p=0.9336</p> <p>Veh + AAV9-CMV-eGFP-SCR vs. Pac + AAV9-CMV-eGFP-SCR p&lt;0.0001</p> <p>Veh + AAV9-CMV-eGFP-SCR vs. Pac + AAV9-CMV-eGFP-Nav1.7-CRS p=0.0025</p> <p>Veh + AAV9-CMV-eGFP-Nav1.7-CRS vs. Pac + AAV9-CMV-eGFP-SCR p&lt;0.0001</p>                                                                                                                                                                                                                                                                                                                                                                                                                                                                                                                                                                                                                                                                                                                                                                                                                               | <p>Veh + AAV9-CMV-eGFP-SCR (n=8)</p> <p>Veh + AAV9-CMV-eGFP-Nav1.7-CRS (n=8)</p> <p>Pac + AAV9-CMV-eGFP-SCR (n=8)</p>                                             |  |

|          |                                                                                   |                                                                   |                                                                                                                                                                                                                                                                                                                                                |                                                                                                                                  |  |
|----------|-----------------------------------------------------------------------------------|-------------------------------------------------------------------|------------------------------------------------------------------------------------------------------------------------------------------------------------------------------------------------------------------------------------------------------------------------------------------------------------------------------------------------|----------------------------------------------------------------------------------------------------------------------------------|--|
|          |                                                                                   |                                                                   | Veh + AAV9-CMV-eGFP-Nav1.7-CRS vs. Pac + AAV9-CMV-eGFP-Nav1.7-CRS p=0.0005<br>Pac + AAV9-CMV-eGFP-SCR vs. Pac + AAV9-CMV-eGFP-Nav1.7-CRS p<0.0001                                                                                                                                                                                              | Pac + AAV9-CMV-eGFP-Nav1.7-CRS (n=8)                                                                                             |  |
| Fig 8B   | Nav1.7 pull down from Macaque DRG                                                 | Mann-Whitney test                                                 | Nav1.7-CRS vs. Scramble p=0.0286                                                                                                                                                                                                                                                                                                               | Nav1.7-CRS (n=4)<br>Scramble (n=4)                                                                                               |  |
| Fig 8E   | Macaque DRG whole cell patch clamp electrophysiology – peak current density       | Kruskal-Wallis Test; p<0.0001<br>Kruskal-Wallis statistic = 22.99 | AAV-CMV-SCR vs. AAV-CMV-SCR + Protox, p=0.0154<br><br>AAV-CMV-SCR vs. AAV-CMV-Nav1.7, p=0.0010<br><br>AAV-CMV-SCR vs. AAV-CMV-Nav1.7 + Protox, p<0.0001<br><br>AAV-CMV-SCR + Protox vs. AAV-CMV-Nav1.7, p>0.9999<br><br>AAV-CMV-SCR + Protox vs. AAV-CMV-Nav1.7 + Protox, p>0.9999<br><br>AAV-CMV-Nav1.7 vs. AAV-CMV-Nav1.7 + Protox, p>0.9999 | AAV9-SCR (n=13)<br><br>AAV9-Nav1.7-CRS (n=12)<br><br>AAV9-SCR + 5nM ProTx-II (n=17)<br><br>AAV9-Nav1.7-CRS + 5nM ProTx-II (n=16) |  |
| Fig 8I   | Macaque DRG whole cell patch clamp electrophysiology – TTX-R peak current density | Mann-Whitney test                                                 | AAV9-Nav1.7-CRS + 300 nM TTX vs. AAV9-SCR + 300 nM TTX p=0.4865                                                                                                                                                                                                                                                                                | AAV9-SCR + 300 nM TTX (n=11)<br><br>AAV9-Nav1.7-CRS (n=11)                                                                       |  |
| Table S4 | Macaque DRG whole cell patch clamp electrophysiology – TTX-R channel kinetics     | Mann-Whitney test                                                 | AAV9-SCR + TTX vs AAV9-Nav1.7-CRS+ TTX<br><br>Activation V1/2 P=0.7026<br>K P=0.5853                                                                                                                                                                                                                                                           | AAV9-SCR + TTX Activation V1/2 (n=11)<br>K (n=11)<br><br>AAV9-Nav1.7-CRS+ TTX Activation V1/2 (n=11)<br>K (n=11)                 |  |
|          | Macaque DRG whole cell patch clamp electrophysiology – ProTx-II                   | One-Way ANOVA                                                     | V1/2 Activation AAV9-SCR + Vehicle vs AAV9-SCR + 5 nM ProTx-II P=0.0037                                                                                                                                                                                                                                                                        | AAV9-SCR + Vehicle Activation V1/2 (n=13)<br>K (n=13)                                                                            |  |

|                  |  |  |                                                                                                                                                                                                                                                                                                                                                                                                                                                                                                                                                                                                                                                                                                                                                                                                                                                                                                                                                     |                                                                                                                                                                                                                                                   |  |
|------------------|--|--|-----------------------------------------------------------------------------------------------------------------------------------------------------------------------------------------------------------------------------------------------------------------------------------------------------------------------------------------------------------------------------------------------------------------------------------------------------------------------------------------------------------------------------------------------------------------------------------------------------------------------------------------------------------------------------------------------------------------------------------------------------------------------------------------------------------------------------------------------------------------------------------------------------------------------------------------------------|---------------------------------------------------------------------------------------------------------------------------------------------------------------------------------------------------------------------------------------------------|--|
| channel kinetics |  |  | <p>AAV9-SCR +<br/>Vehicle vs AAV9-Nav1.7-CRS+<br/>Vehicle<br/>P=0.9790</p> <p>AAV9-SCR +<br/>Vehicle vs AAV9-Nav1.7-CRS+<br/>5 nM ProTx-II<br/>P=0.1558</p> <p>AAV9-SCR +<br/>5 nM ProTx-II vs AAV9-Nav1.7-CRS+<br/>Vehicle<br/>P=0.0175</p> <p>AAV9-SCR +<br/>5 nM ProTx-II vs AAV9-Nav1.7-CRS+<br/>5 nM ProTx-II<br/>P=0.2996</p> <p>AAV9-Nav1.7-CRS+ Vehicle vs AAV9-Nav1.7-CRS+<br/>5 nM ProTx-II<br/>P=0.3917</p> <p><u>Slope Values</u><br/>AAV9-SCR +<br/>Vehicle vs AAV9-SCR +<br/>5 nM ProTx-II<br/>P=0.7661</p> <p>AAV9-SCR +<br/>Vehicle vs AAV9-Nav1.7-CRS+<br/>Vehicle<br/>P=0.7296</p> <p>AAV9-SCR +<br/>Vehicle vs AAV9-Nav1.7-CRS+<br/>5 nM ProTx-II<br/>P=0.7412</p> <p>AAV9-SCR +<br/>5 nM ProTx-II vs AAV9-Nav1.7-CRS+<br/>Vehicle<br/>P=0.2656</p> <p>AAV9-SCR +<br/>5 nM ProTx-II vs AAV9-Nav1.7-CRS+<br/>5 nM ProTx-II<br/>p&gt;0.9999</p> <p>AAV9-Nav1.7-CRS+ Vehicle vs AAV9-Nav1.7-CRS+<br/>5 nM ProTx-II<br/>P=0.2151</p> | <p>AAV9-SCR +<br/>5 nM ProTx-II<br/>Activation<br/>V1/2 (n=13)<br/>K (n=13)</p> <p>AAV9-Nav1.7-CRS+ Vehicle<br/>Activation<br/>V1/2 (n=17)<br/>K (n=17)</p> <p>AAV9-Nav1.7-CRS+<br/>5 nM ProTx-II<br/>Activation<br/>V1/2 (n=14)<br/>K (n=14)</p> |  |
|------------------|--|--|-----------------------------------------------------------------------------------------------------------------------------------------------------------------------------------------------------------------------------------------------------------------------------------------------------------------------------------------------------------------------------------------------------------------------------------------------------------------------------------------------------------------------------------------------------------------------------------------------------------------------------------------------------------------------------------------------------------------------------------------------------------------------------------------------------------------------------------------------------------------------------------------------------------------------------------------------------|---------------------------------------------------------------------------------------------------------------------------------------------------------------------------------------------------------------------------------------------------|--|
